# Supplementary material for: Label-free fluorescence detection of mercury ions based on the regulation of the Ag autocatalytic reaction
Source: Royal Society of Chemistry journal article supplement (doi:10.1039/c4an02162b), 2015-01-01
Supplement: c4an02162b1.pdf [file c4an02162b1.pdf]

**Supporting information**

**Label-free fluorescent detection of mercury ion based on the  
regulation of Ag autocatalytic reaction**

Haichao Dai <sup>a,b</sup>, Pengjuan Ni <sup>a,b</sup>, Yujing Sun <sup>a</sup>, Jingting Hu <sup>a,b</sup>, Shu Jiang <sup>a,b</sup>, Yilin  
Wang <sup>a,b</sup>, and Zhuang Li <sup>a,\*</sup>

*<sup>a</sup>State Key Laboratory of Electroanalytical Chemistry, Changchun Institute of  
Applied Chemistry, Chinese Academy of Sciences, Changchun, Jilin 130022, China*

*<sup>b</sup>University of Chinese Academy of Sciences, Beijing 100039, China*

---

\* Corresponding author at:  
State Key Laboratory of Electroanalytical Chemistry, Changchun Institute of Applied Chemistry, Chinese  
Academy of Sciences, Changchun, Jilin 130022, China.  
Fax /Tel: +86 431 85262057.  
E-mail: [zli@ciac.ac.cn](mailto:zli@ciac.ac.cn)

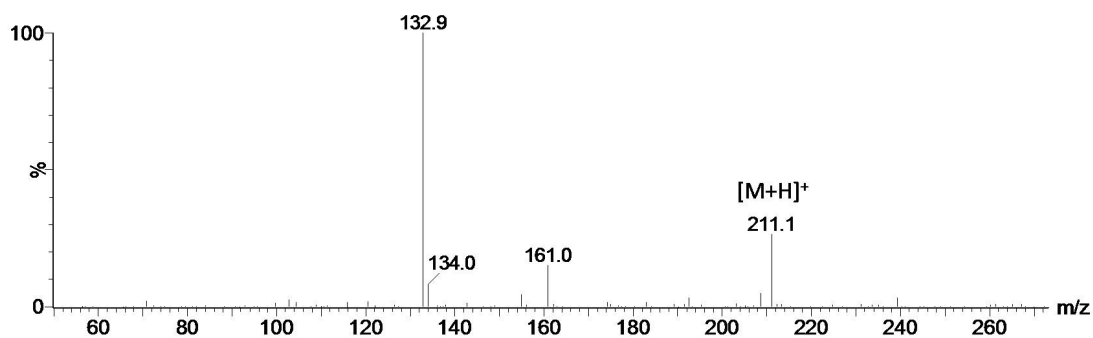

Fig. S1 The mass spectrometry of OPDox.

To prove the formation of OPDox, we first purified the obtained OPDox and the steps were as follows: 15.9 mL of 6 mM OPD were diluted into 500.0 mL of PBS buffer (10 mM, pH 6.5), followed by the addition of 8.5 mL of 6 mM  $\text{AgNO}_3$ . After incubation for 10 min, ethanol and water were removed by rotary evaporation. The crude product was dissolved in ethanol and centrifuged. The final solution was tested by MALDI-TOF-MS and m/z for  $[\text{M}+\text{H}]^+$  was 211.1 and the relative molecular mass was 210.1, which was the same with 2,3-diaminophennazine.

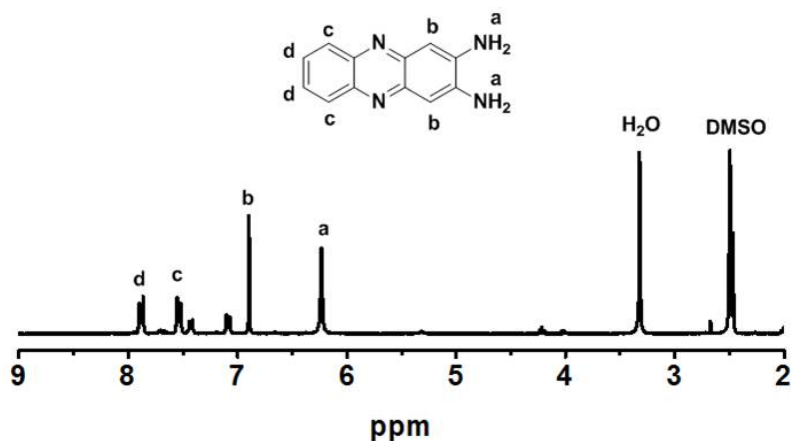

Fig. S2 The  $^1\text{H}$  NMR spectrometry of OPDox.

Before the NMR measurement, the crude product was purified by flash chromatography with ethyl acetate to afford 2,3-diaminophennazine (OPDox), and the NMR result was as follows:

$^1\text{H}$  NMR (400 MHz,  $\text{DMSO-d}_6$ )  $\delta$ =7.87-7.90 (2H), 7.52-7.55 (2H), 6.89 (2H), 6.23 (4H).

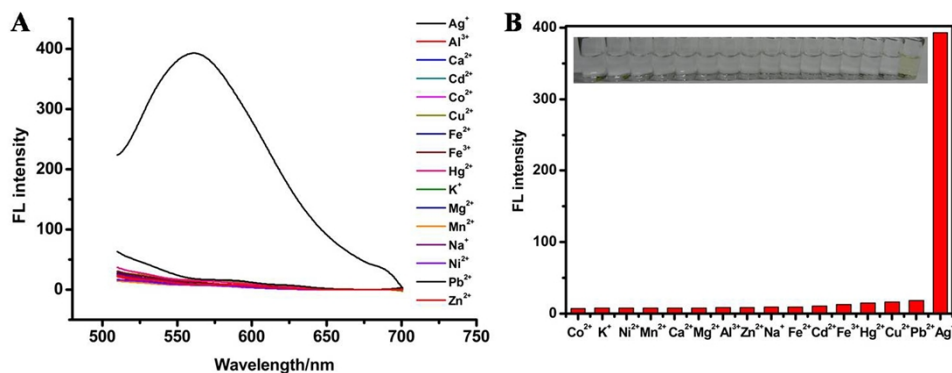

**Fig. S3** (A) The fluorescence graphs of OPD with different metal ions. (B) The selectivity of OPD to different metal ions. Inset: The photograph of OPD solutions with different metal ions. The concentrations for OPD and metal ions were 180  $\mu\text{M}$  and 96  $\mu\text{M}$ , respectively.

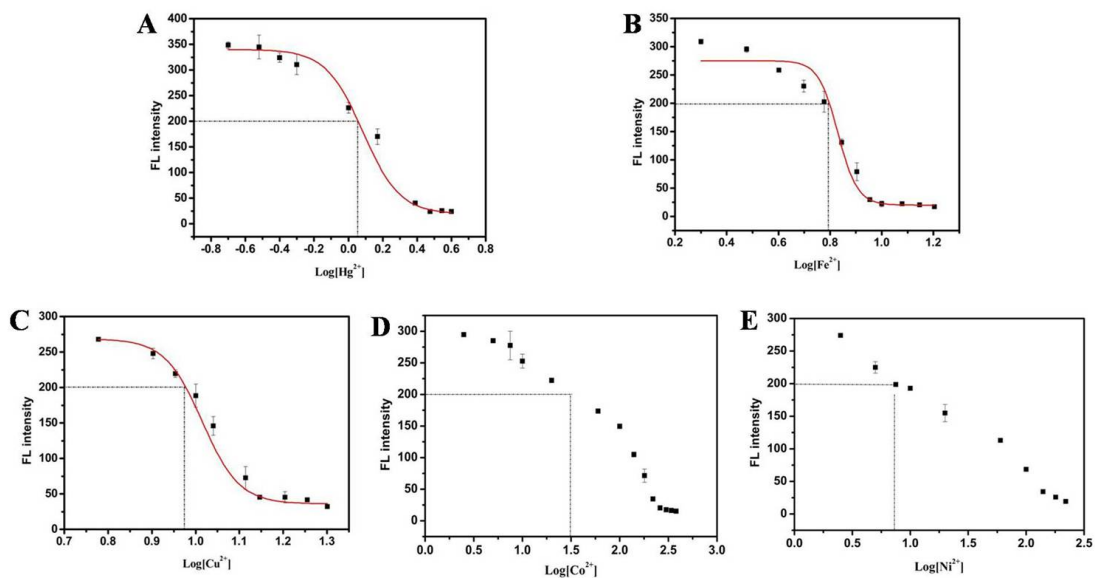

**Fig. S4** Inhibitory effect of (A)  $\text{Hg}^{2+}$ , (B)  $\text{Fe}^{2+}$ , (C)  $\text{Cu}^{2+}$ , (D)  $\text{Co}^{2+}$ , and (E)  $\text{Ni}^{2+}$  on the  $\text{Ag}^+$  autocatalysis.

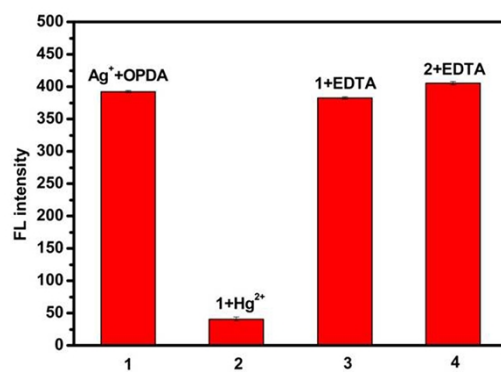

**Fig. S5** The fluorescence recovery results of the autocatalytic reaction upon the addition of EDTA: (1) OPD in the presence of 96  $\mu\text{M}$   $\text{Ag}^+$ , (2) (1) with 2  $\mu\text{M}$   $\text{Hg}^{2+}$ , (3) (1) with 6  $\mu\text{M}$  EDTA, and (4) (2) with 6  $\mu\text{M}$  EDTA.

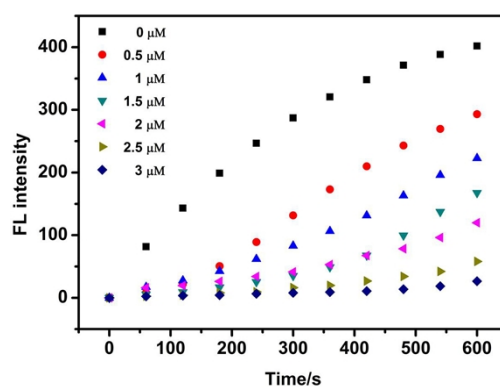

**Fig. S6** Time-dependent fluorescence change of the Ag autocatalysis to different concentrations of  $\text{Hg}^{2+}$  (0, 0.5, 1.0, 1.5, 2.0, 2.5, 3.0  $\mu\text{M}$ ).
